# Supplementary material for: Worldwide circulation of HSV-2 × HSV-1 recombinant strains
Source: PubMed Central journal article supplement (PMC5347006; doi:10.1038/srep44084), 2017-03-13
Supplement: srep44084-s1.pdf [file srep44084-s1.pdf]

## Supplementary Information

Worldwide circulation of HSV-2 x HSV-1 recombinant strains

David M. Koelle, Peter Norberg, Matthew P. Fitzgibbon, Ronnie M. Russell, Alex L. Greninger, Meei-Li Huang, Larry Stensland, Lichen Jing, Amalia S. Magaret, Kurt Diem, Stacy Selke, Hong Xie, Connie Celum, Jairam R. Lingappa, Keith R. Jerome, Anna Wald, Christine Johnston

1 Koelle *et al.* Supporting Information

2

3 Supporting Information Methods

4

5 Subjects and Specimens. Genital swab were obtained and DNA prepared as published (1).  
6 Specimens were initially analyzed for the presence of HSV DNA using real-time PCR. The  
7 initial PCR detects a type-common target in HSV gene *UL27* that is identical between HSV-1  
8 and HSV-2 (1). The HSV species in positive specimens was then typed using published (2)  
9 type-specific real-time PCR targeting HSV type-specific sequences in gene *US4*. Sources of  
10 swabs included HPTN039, a study of the effect of acyclovir on HIV-1 acquisition by HSV-2-  
11 infected persons (3), Partners in Prevention, a study of the effect of acyclovir on HIV-1  
12 transmissibility by HIV-1/HSV-2 co-infected persons (4), and natural history and drug treatment  
13 studies in Seattle and Portland, USA including a study of pritelivir, a candidate anti-HSV drug  
14 (5).

15

16 Sequencing. HSV-2 lab strains HG52, 333, and 186 are in long-time use in our lab, while HSV-  
17 2 lab strain G was newly obtained from ATCC (Manassas, VA). Virus was cultured in Vero cells  
18 and isolated as described (6). *UL39* was PCR-amplified with primers  
19 *UL39wholeprimerF\_86940-86959* and *UL39wholeprimerR\_90508-90526*, and dideoxy-  
20 sequenced with primers F-HX1 through F-HX5 and R-HX1 (SI Table 6). For specimen  
21 2010\_29297 from donor 5060, DNA was similarly amplified and sequenced with primer  
22 *UL39VarF* (SI Table 5). For specimen 2008\_35742 from donor 6376, C-terminal *UL39* was  
23 amplified with the *UL39 Var* primer pair (SI Table 5) and sequenced with the same primers. To  
24 investigate mixed strain shedding, specimens from Peru332 R-103-1010 were amplified with the  
25 *UL39Var*-primer pair and bulk amplicons either sequenced using the same primers or cloned  
26 (TOPO-TA kit, Invitrogen, agCarlsbad, CA) and plasmid DNA from 9 random bacterial colonies

27 sequenced with primer M13F-21 (SI Table 5). NGS used the Illumina platform. The protocol for  
28 direct sequencing of swab DNA without target enrichment has been described separately (7).  
29 For selected swab DNA specimens, HSV-2 DNA was enriched using a custom biotinylated  
30 120bp oligonucleotide panel (IDT, Coralville, IA) tiling across HSV-2 strain HG52 Genbank  
31 NC\_001798 genome (Greninger *et al.* in preparation). For these samples, libraries were  
32 created using Fragmentase™ (New England Biolabs, Ipswich, MA), *E. coli* DNA polymerase, T4  
33 polynucleotide kinase, and Taq DNA polymerase (8), followed by amplification with barcoded  
34 TruSeq™ (Illumina, San Diego, CA) primers and pooling prior to enrichment. Libraries were  
35 enriched using the manufacturer's reagents and protocols (IDT) and sequenced using a single  
36 ended v3 150bp kit and MiSeq instrument (Illumina). Non-enriched sequence reads were filtered  
37 by discarding human reads and aligning to the HSV-2 HG52 genome while post-enrichment  
38 libraries were aligned directly the HG52 genome.

39  
40 HSV genotyping by digital droplet PCR (ddPCR). Two reactions were used for *UL39* and one for  
41 *UL30*. The first *UL39* reaction resolved HSV type in the 5' portion of the long *UL39*  
42 recombination (see main text). Primers and probes (SI Table 4) allowed differentiation of HSV  
43 type in the vicinity of HSV-2 *UL39* bp 2415-2428 (coordinates from Genbank M12700.1 for  
44 strain HSV-2 186) from the homologous but different HSV-1 sequence in the vicinity of *UL39* bp  
45 2394-2407 (Genbank JN555585.1 for strain HSV-1 17+). The second *UL39* reaction resolved  
46 HSV type towards the 3' end of the long *UL39* recombination. Primers and probes specified  
47 type-specific signals in the vicinity of HSV-2 *UL39* bp 2671-2683, homologous to but different  
48 from HSV-1 sequence in the vicinity of *UL39* bp 2650-2662 region. The *UL30* reaction  
49 differentiated between bp 3000-3100 of the HSV-2 strain 186 sequence from almost identical  
50 regions of HSV-2v. For each reaction, 25 µl mixes were assembled from 12.5 µl ddPCR SI  
51 2xSupermix (BioRad), 500 nM each primer, 250 nM each probe and 10 µl DNA. Twenty µl was

52 used to generate droplets that were amplified, analyzed and counted. The amplification thermal  
53 cycling profile was 94 °C for 10 minutes, followed by 45 cycles of 94 °C for 30 seconds and 60  
54 °C for 1 minute, then hold at 98 °C for 10 minutes followed by 4 °C until analyzed. For each  
55 reaction, VIC and FAM fluorescence indicated distinct HSV genotypes (see main text).

56

57

58 References for Koelle *et al.* Supporting Information

59

- 60 1. Jerome KR, Huang ML, Wald A, Selke S, & Corey L (2002) Quantitative stability of DNA after  
61 extended storage of clinical specimens as determined by real-time PCR. *Journal of clinical*  
62 *microbiology* 40(7):2609-2611.
- 63 2. Corey L, Huang ML, Selke S, & Wald A (2005) Differentiation of herpes simplex virus types 1 and  
64 2 in clinical samples by a real-time taqman PCR assay. *Journal of medical virology* 76(3):350-355.
- 65 3. Celum C, *et al.* (2008) Effect of aciclovir on HIV-1 acquisition in herpes simplex virus 2  
66 seropositive women and men who have sex with men: a randomised, double-blind, placebo-  
67 controlled trial. *Lancet* 371(9630):2109-2119.
- 68 4. Celum C, *et al.* (2010) Acyclovir and transmission of HIV-1 from persons infected with HIV-1 and  
69 HSV-2. *The New England journal of medicine* 362(5):427-439.
- 70 5. Wald A, *et al.* (2014) Helicase-primase inhibitor pritelivir for HSV-2 infection. *The New England*  
71 *journal of medicine* 370(3):201-210.
- 72 6. Koelle DM, *et al.* (2001) CD8 CTL from genital herpes simplex lesions: recognition of viral  
73 tegument and immediate early proteins and lysis of infected cutaneous cells. *Journal of*  
74 *immunology* 166(6):4049-4058.
- 75 7. Johnston C, Magaret, A., Diem, K., Fitzgibbon, M, Huang, M., Selke, S., Rashevsky A., Lingappa,  
76 J.R., Celum, C., Koelle, D.M., Wald, A. (Sequence heterogeneity in herpes simplex virus type 2  
77 identified using next generation sequencing. *In preparation.*
- 78 8. Salipante SJ, *et al.* (2015) Characterization of a multidrug-resistant, novel *Bacteroides*  
79 *genomospecies*. *Emerging infectious diseases* 21(1):95-98.

80

Supporting Information Table 1. Alternative names, Genbank and literature references of previously reported HSV-2 *UL39* sequences analyzed.

| Reference, name in this report | Previous name(s) | Continent | Genbank accession | Pubmed PMID number of literature citation for sequence |
|--------------------------------|------------------|-----------|-------------------|--------------------------------------------------------|
| Lab strains                    |                  |           |                   |                                                        |
| 186                            | None             | N America | JX112656.1        | 5694774, none for sequence                             |
| SD90e                          | None             | Africa    | KF781518.1        | 24503076                                               |
| HG52                           | None             | Europe    | JN561323.2        | None, update of 9499055                                |
| 333                            | None             | N America | KP192856.1        | 25855744                                               |
| Kolb <i>et al.</i> 2015        |                  |           |                   |                                                        |
| 1192                           | None             | N America | KP334095.1        | 25855744                                               |
| GSC-56                         | None             | N America | KP334094.1        | 25855744                                               |
| CtSF                           | None             | N America | KP334097.1        | 25855744                                               |
| CtSF-R                         | None             | N America | KP334093.1        | 25855744                                               |
| COH 3818                       | None             | N America | KP334096.1        | 25855744                                               |
| Newman <i>et al.</i> 2015      |                  |           |                   |                                                        |
| G19070                         | 8937_1999_3336   | N America | KR135298          | 26018166                                               |
| G19083                         | 10883_2001_13347 | N America | KR135311          | 26018166                                               |
| G19084                         | 9335_2005_576    | N America | KR135312          | 26018166                                               |
| G19085                         | 9335_2007_14     | N America | KR135313          | 26018166                                               |
| G19086                         | 7444_1996_25809  | N America | KR135314          | 26018166                                               |
| 89_350_MA__KR135321            | 89_390           | N America | KR135321          | 26018166                                               |
| G19080                         | 44_619833        | N America | KR135308          | 26018166                                               |
| G19081                         | 44_419851        | N America | KR135309          | 26018166                                               |

|                     |            |           |          |          |
|---------------------|------------|-----------|----------|----------|
| G19082              | 44_319857  | N America | KR135310 | 26018166 |
| BethesdaP5 KR135330 | BethesdaP5 | N America | KR135298 | 26018166 |
| G19071              | M22987     | Africa    | KR135299 | 26018166 |
| G19072              | D30613     | Africa    | KR135300 | 26018166 |
| G19073              | F70764     | Africa    | KR135301 | 26018166 |
| G19074              | M1119      | Africa    | KR135302 | 26018166 |
| G19075              | L22861     | Africa    | KR135303 | 26018166 |
| G19076              | H00066     | Africa    | KR135304 | 26018166 |
| G19077              | K39924     | Africa    | KR135305 | 26018166 |
| G19078              | A76191     | Africa    | KR135306 | 26018166 |
| G19079              | J09622     | Africa    | KR135307 | 26018166 |
| G19087              | J32715     | Africa    | KR135315 | 26018166 |
| G19088              | G75809     | Africa    | KR135316 | 26018166 |
| G19089              | A76832     | Africa    | KR135317 | 26018166 |
| G19090              | D39650     | Africa    | KR135318 | 26018166 |
| G19091              | D39765     | Africa    | KR135319 | 26018166 |
| SD66 KR135320       | SD66       | Africa    | KR135320 | 26018166 |
| G32586_UL39_JA1     | JA1        | Asia      | KR135322 | 26018166 |
| G32587_UL39_JA2     | JA2        | Asia      | KR135323 | 26018166 |
| G32588_UL39_JA3     | JA3        | Asia      | KR135324 | 26018166 |
| G32589_UL39_JA5     | JA5        | Asia      | KR135325 | 26018166 |
| G32590_UL39_JA6     | JA6        | Asia      | KR135326 | 26018166 |
| G32591_UL39_JA7     | JA7        | Asia      | KR135327 | 26018166 |
| G32592_UL39_JA8     | JA8        | Asia      | KR135328 | 26018166 |

|                 |                |         |                                         |                |
|-----------------|----------------|---------|-----------------------------------------|----------------|
| G32593_UL39_JA9 | JA9            | Asia    | KR135329                                | 26018166       |
| Various         | Not applicable | Various | KX574860 through<br>KX574908, inclusive | Not applicable |



Supporting Information Table 2. HSV-2 *UL39* length variation and amino acids indels relative to strain 186.

| representative strain | location of indel relative to HSV-2 strain 186 <i>UL39</i> | change               | length, AA | Genbank  |
|-----------------------|------------------------------------------------------------|----------------------|------------|----------|
| 186                   | not applicable                                             | not applicable       | 1144       | JX112656 |
| SD90e                 | between S118 and A122                                      | del GPS <sup>1</sup> | 1141       | KF781518 |
| G                     | between S118 and A122                                      | del GPS <sup>1</sup> | 1141       | KT992822 |
| HG52                  | between G205 and S208                                      | del SG <sup>2</sup>  | 1142       | JN561323 |
| D39650                | between G275 and T276                                      | ins AG <sup>3</sup>  | 1146       | KR135318 |

<sup>1</sup>Deletion is ambiguous as strain 186 sequence is SGPS in this region. Change could also be recorded as deletion SGP. In strain SD90e, one S is retained.

<sup>2</sup>Deletion is ambiguous as strain 186 sequence is GSG in this region. Deletion could also be recorded as deletion GS. In strain HG52, one G is retained.

<sup>3</sup>Insertion is ambiguous as strain 186 sequence is GAG in this region. In strain D39650, GAG peptide expands to GAGAG.

Supporting Information Table 3. SNPs within the HSV-1 inserts in HSV-2 *UL39* sequences.

| Location in <i>UL39</i> consensus <sup>1</sup> | Prototype virus species and strain |                       | Strains representative of prevalent <i>UL39</i> IRV clades with single HSV-1 inserts |                              |                   |                              | Rare strains with unique <i>UL39</i> genotypes with single HSV-1 inserts |                              |                                      |                              | Rare strains with unique <i>UL39</i> genotypes with complex, multiple HSV-1 inserts or crossovers |                              |                          |                              |                          |                              |   |   |
|------------------------------------------------|------------------------------------|-----------------------|--------------------------------------------------------------------------------------|------------------------------|-------------------|------------------------------|--------------------------------------------------------------------------|------------------------------|--------------------------------------|------------------------------|---------------------------------------------------------------------------------------------------|------------------------------|--------------------------|------------------------------|--------------------------|------------------------------|---|---|
|                                                | HSV-2 186 <sup>3</sup>             | HSV-1 17 <sup>3</sup> | G19080 <sup>4</sup> long insert                                                      |                              | HG52 short insert |                              | 2008_35742 <sup>4</sup> short insert                                     |                              | 2010_29297 <sup>4</sup> short insert |                              | G19083 <sup>4</sup>                                                                               |                              | F_2009-4556 <sup>4</sup> |                              | F_2009-2198 <sup>4</sup> |                              |   |   |
|                                                |                                    |                       | Allele                                                                               | Genotype in prototype strain | Allele            | Genotype in prototype strain | Allele                                                                   | Genotype in prototype strain | Allele                               | Genotype in prototype strain | Allele                                                                                            | Genotype in prototype strain | Allele                   | Genotype in prototype strain | Allele                   | Genotype in prototype strain |   |   |
| 5' loci <sup>2</sup>                           |                                    |                       |                                                                                      | 2                            |                   |                              |                                                                          |                              | 2                                    |                              |                                                                                                   |                              |                          | 2                            |                          |                              | 2 |   |
| 2417                                           | A                                  | g                     | A                                                                                    | 2                            | A                 | 2                            | A                                                                        | 2                            | A                                    | 2                            | A                                                                                                 | 2                            | A                        | 2                            | A                        | 2                            | A | 2 |
| 2429                                           | T                                  | c                     | c                                                                                    | 1                            | c                 | 1                            | T                                                                        | 2                            | T                                    | 2                            | c                                                                                                 | 1                            | c                        | 1                            | T                        | 2                            | T | 2 |
| 2450                                           | G                                  | c                     | c                                                                                    | 1                            | c                 | 1                            | G                                                                        | 2                            | G                                    | 2                            | G                                                                                                 | 2                            | c                        | 1                            | G                        | 2                            | G | 2 |
| 2466                                           | T                                  | g                     | g                                                                                    | 1                            | g                 | 1                            | T                                                                        | 2                            | T                                    | 2                            | T                                                                                                 | 2                            | g                        | 1                            | T                        | 2                            | T | 2 |
| 2470                                           | G                                  | c                     | c                                                                                    | 1                            | c                 | 1                            | G                                                                        | 2                            | G                                    | 2                            | c                                                                                                 | 1                            | c                        | 1                            | c                        | 1                            | c | 1 |
| 2474                                           | A                                  | g                     | g                                                                                    | 1                            | g                 | 1                            | A                                                                        | 2                            | A                                    | 2                            | A                                                                                                 | 2                            | g                        | 1                            | A                        | 2                            | A | 2 |
| 2477                                           | C                                  | a                     | a                                                                                    | 1                            | a                 | 1                            | C                                                                        | 2                            | C                                    | 2                            | C                                                                                                 | 2                            | a                        | 1                            | C                        | 2                            | C | 2 |
| 2483                                           | C                                  | t                     | t                                                                                    | 1                            | t                 | 1                            | C                                                                        | 2                            | C                                    | 2                            | C                                                                                                 | 2                            | t                        | 1                            | C                        | 2                            | C | 2 |
| 2501                                           | C                                  | a                     | a                                                                                    | 1                            | a                 | 1                            | C                                                                        | 2                            | C                                    | 2                            | a                                                                                                 | 1                            | a                        | 1                            | C                        | 2                            | C | 2 |
| 2529                                           | C                                  | a                     | a                                                                                    | 1                            | a                 | 1                            | C                                                                        | 2                            | a                                    | 1                            | C                                                                                                 | 2                            | C                        | 2                            | C                        | 2                            | C | 2 |
| 2533                                           | G                                  | a                     | a                                                                                    | 1                            | a                 | 1                            | G                                                                        | 2                            | a                                    | 1                            | G                                                                                                 | 2                            | G                        | 2                            | G                        | 2                            | G | 2 |
| 2540                                           | C                                  | t                     | t                                                                                    | 1                            | t                 | 1                            | C                                                                        | 2                            | t                                    | 1                            | t                                                                                                 | 1                            | C                        | 2                            | C                        | 2                            | C | 2 |
| 2543                                           | T                                  | c                     | c                                                                                    | 1                            | c                 | 1                            | T                                                                        | 2                            | c                                    | 1                            | c                                                                                                 | 1                            | T                        | 2                            | T                        | 2                            | T | 2 |
| 2549                                           | C                                  | g                     | g                                                                                    | 1                            | g                 | 1                            | C                                                                        | 2                            | g                                    | 1                            | g                                                                                                 | 1                            | C                        | 2                            | C                        | 2                            | C | 2 |
| 2550                                           | A                                  | c                     | c                                                                                    | 1                            | c                 | 1                            | A                                                                        | 2                            | c                                    | 1                            | c                                                                                                 | 1                            | A                        | 2                            | A                        | 2                            | A | 2 |
| 2551                                           | T                                  | g                     | g                                                                                    | 1                            | g                 | 1                            | T                                                                        | 2                            | g                                    | 1                            | g                                                                                                 | 1                            | T                        | 2                            | T                        | 2                            | T | 2 |
| 2582                                           | A                                  | g                     | g                                                                                    | 1                            | g                 | 1                            | A                                                                        | 2                            | g                                    | 1                            | A                                                                                                 | 2                            | A                        | 2                            | g                        | 1                            | g | 1 |
| 2588                                           | T                                  | g                     | g                                                                                    | 1                            | g                 | 1                            | T                                                                        | 2                            | g                                    | 1                            | T                                                                                                 | 2                            | T                        | 2                            | T                        | 2                            | T | 2 |
| 2591                                           | T                                  | c                     | c                                                                                    | 1                            | c                 | 1                            | T                                                                        | 2                            | c                                    | 1                            | T                                                                                                 | 2                            | T                        | 2                            | T                        | 2                            | T | 2 |
| 2600                                           | A                                  | c                     | c                                                                                    | 1                            | c                 | 1                            | A                                                                        | 2                            | c                                    | 1                            | A                                                                                                 | 2                            | A                        | 2                            | A                        | 2                            | A | 2 |
| 2612                                           | G                                  | a                     | a                                                                                    | 1                            | a                 | 1                            | a                                                                        | 1                            | a                                    | 1                            | G                                                                                                 | 2                            | G                        | 2                            | a                        | 1                            | a | 1 |
| 2615                                           | G                                  | a                     | a                                                                                    | 1                            | a                 | 1                            | a                                                                        | 1                            | a                                    | 1                            | G                                                                                                 | 2                            | G                        | 2                            | a                        | 1                            | a | 1 |
| 2618                                           | G                                  | c                     | c                                                                                    | 1                            | c                 | 1                            | c                                                                        | 1                            | c                                    | 1                            | G                                                                                                 | 2                            | G                        | 2                            | c                        | 1                            | c | 1 |
| 2631                                           | G                                  | a                     | a                                                                                    | 1                            | a                 | 1                            | a                                                                        | 1                            | a                                    | 1                            | G                                                                                                 | 2                            | G                        | 2                            | a                        | 1                            | a | 1 |
| 2640                                           | C                                  | a                     | a                                                                                    | 1                            | a                 | 1                            | a                                                                        | 1                            | a                                    | 1                            | C                                                                                                 | 2                            | C                        | 2                            | a                        | 1                            | a | 1 |
| 2663                                           | C                                  | a                     | a                                                                                    | 1                            | C                 | 2                            | a                                                                        | 1                            | a                                    | 1                            | C                                                                                                 | 2                            | C                        | 2                            | C                        | 2                            | C | 2 |
| 2666                                           | T                                  | c                     | c                                                                                    | 1                            | T                 | 2                            | c                                                                        | 1                            | c                                    | 1                            | T                                                                                                 | 2                            | T                        | 2                            | T                        | 2                            | T | 2 |
| 2690                                           | G                                  | c                     | c                                                                                    | 1                            | G                 | 2                            | c                                                                        | 1                            | c                                    | 1                            | G                                                                                                 | 2                            | G                        | 2                            | G                        | 2                            | G | 2 |
| 2700                                           | A                                  | c                     | c                                                                                    | 1                            | A                 | 2                            | c                                                                        | 1                            | c                                    | 1                            | A                                                                                                 | 2                            | A                        | 2                            | A                        | 2                            | A | 2 |
| 2705                                           | C                                  | g                     | g                                                                                    | 1                            | C                 | 2                            | g                                                                        | 1                            | g                                    | 1                            | C                                                                                                 | 2                            | C                        | 2                            | C                        | 2                            | C | 2 |
| 2720                                           | G                                  | t                     | t                                                                                    | 1                            | G                 | 2                            | t                                                                        | 1                            | t                                    | 1                            | t                                                                                                 | 1                            | t                        | 1                            | G                        | 2                            | G | 2 |
| 2726                                           | G                                  | a                     | a                                                                                    | 1                            | G                 | 2                            | a                                                                        | 1                            | a                                    | 1                            | G                                                                                                 | 2                            | a                        | 1                            | G                        | 2                            | G | 2 |
| 2729                                           | C                                  | t                     | t                                                                                    | 1                            | C                 | 2                            | t                                                                        | 1                            | t                                    | 1                            | C                                                                                                 | 2                            | t                        | 1                            | C                        | 2                            | C | 2 |
| 2731                                           | G                                  | a                     | a                                                                                    | 1                            | G                 | 2                            | a                                                                        | 1                            | a                                    | 1                            | G                                                                                                 | 2                            | a                        | 1                            | G                        | 2                            | G | 2 |
| 2743                                           | C                                  | a                     | a                                                                                    | 1                            | C                 | 2                            | a                                                                        | 1                            | a                                    | 1                            | C                                                                                                 | 2                            | a                        | 1                            | C                        | 2                            | C | 2 |
| 2768                                           | C                                  | g                     | g                                                                                    | 1                            | C                 | 2                            | g                                                                        | 1                            | g                                    | 1                            | C                                                                                                 | 2                            | g                        | 1                            | C                        | 2                            | C | 2 |
| 2769                                           | G                                  | t                     | t                                                                                    | 1                            | G                 | 2                            | t                                                                        | 1                            | t                                    | 1                            | G                                                                                                 | 2                            | t                        | 1                            | G                        | 2                            | G | 2 |
| 2774                                           | C                                  | g                     | g                                                                                    | 1                            | C                 | 2                            | g                                                                        | 1                            | g                                    | 1                            | C                                                                                                 | 2                            | g                        | 1                            | C                        | 2                            | C | 2 |
| 2786                                           | T                                  | c                     | c                                                                                    | 1                            | T                 | 2                            | c                                                                        | 1                            | c                                    | 1                            | T                                                                                                 | 2                            | c                        | 1                            | T                        | 2                            | T | 2 |
| 2810                                           | G                                  | c                     | c                                                                                    | 78G                          | G                 | 2                            | c                                                                        | 1                            | c                                    | 1                            | G                                                                                                 | 2                            | c                        | 1                            | G                        | 2                            | G | 2 |
| 2821                                           | G                                  | a                     | a                                                                                    | 1                            | G                 | 2                            | a                                                                        | 1                            | a                                    | 1                            | G                                                                                                 | 2                            | G                        | 2                            | G                        | 2                            | G | 2 |
| 2843                                           | C                                  | t                     | t                                                                                    | 1                            | C                 | 2                            | t                                                                        | 1                            | t                                    | 1                            | C                                                                                                 | 2                            | C                        | 2                            | C                        | 2                            | C | 2 |
| 2846                                           | G                                  | c                     | c                                                                                    | 1                            | G                 | 2                            | c                                                                        | 1                            | c                                    | 1                            | G                                                                                                 | 2                            | G                        | 2                            | G                        | 2                            | G | 2 |
| 2874                                           | T                                  | c                     | c                                                                                    | 1                            | T                 | 2                            | c                                                                        | 1                            | c                                    | 1                            | T                                                                                                 | 2                            | c                        | 1                            | T                        | 2                            | T | 2 |
| 2877                                           | A                                  | g                     | g                                                                                    | 1                            | A                 | 2                            | g                                                                        | 1                            | g                                    | 1                            | A                                                                                                 | 2                            | g                        | 1                            | A                        | 2                            | A | 2 |
| 2883                                           | A                                  | c                     | c                                                                                    | 1                            | A                 | 2                            | c                                                                        | 1                            | c                                    | 1                            | A                                                                                                 | 2                            | c                        | 1                            | A                        | 2                            | A | 2 |

|                      |   |   |   |   |   |   |   |   |   |   |   |   |   |   |   |   |
|----------------------|---|---|---|---|---|---|---|---|---|---|---|---|---|---|---|---|
| 2885                 | C | g | g | 1 | C | 2 | g | 1 | g | 1 | C | 2 | g | 1 | C | 2 |
| 2957                 | C | t | C | 2 | C | 2 | C | 2 | C | 2 | C | 2 | C | 2 | C | 2 |
| 3' loci <sup>2</sup> |   |   |   | 2 |   |   |   | 2 |   | 2 |   | 2 |   | 2 |   | 2 |

<sup>1</sup> Loci numbers in consensus sequence from aligning the indicated *UL39* sequences with Clustal Omega (Megaalign, Lasergene, Inc).

<sup>2</sup> Except for scattered strain-specific SNPs and indels, all loci in the 5' and 3' regions outside of the region detailed in this table, for all HSV-2 strains, have HSV-2 strain SD90e/186-like sequences.

<sup>3</sup> HSV-2 alleles are capitalized and HSV-1 alleles are lower case.

<sup>4</sup> The HIV infection status of the subjects from whom these samples were obtained is G19080: HIV-infected; 2008\_35742: HIV-uninfected; 2010\_29297: HIV-uninfected; 19083: HIV-uninfected; 2009-4556: HIV-infected; 2009-2198: HIV-infected

Supporting Information Table 4. Primers and probes for digital droplet PCR.

| Assay      | Amplicon region <sup>1</sup>                                                                                                     | Primer 1 <sup>2</sup>                                                                    | Primer 2 <sup>2</sup>                                                                           | Probe(s) <sup>3</sup>                                                                                                   | Note                                                                                                                                                                                                                        |
|------------|----------------------------------------------------------------------------------------------------------------------------------|------------------------------------------------------------------------------------------|-------------------------------------------------------------------------------------------------|-------------------------------------------------------------------------------------------------------------------------|-----------------------------------------------------------------------------------------------------------------------------------------------------------------------------------------------------------------------------|
| UL39 left  | HSV-2 <i>UL39</i> bp<br>2386- <b>2475</b> ;<br>HSV-1 <i>UL39</i> bp<br>2371-2454                                                 | UL39_1_2371_2390<br>AACCTCTGCAC <u>SG</u> AGATCGT                                        | UL39_1_2437_2454<br>GCATCGGGCCAGATTAC                                                           | UL39_S_MGBP_1P<br>VIC-TCCGGCCTCCAAGC-MGB<br>UL39_S_MGBP_2P<br>FAM- <u>CCC</u> GTCCTGCAAAC-MGB <sup>4</sup>              | Two type-common primers combined with two differentially labeled type-specific probes in one reaction.                                                                                                                      |
| UL39 right | HSV-1 <i>UL39</i> bp<br>2617-2689                                                                                                | UL39_1_2617_2633<br>ACGGCCTGCCTGAAGCT                                                    | UL39_1_2671_2689<br>CCTCGGCGATGTGTTGTT                                                          | UL39_1L_MGB_1P<br>VIC-TCTGCCGAATTC-MGB                                                                                  | Combined with HSV-2 primers and probes in the line below in single reaction with four primers and two probes.                                                                                                               |
| UL39 right | HSV-2 <i>UL39</i> bp<br>2648-2710                                                                                                | UL39_2_2648-2667<br>TGAAGATGGGCTGGATCTG                                                  | UL39_2_2692-2710<br>CCTCGGCGATGTGTTGTT                                                          | UL39_1L_MGB_2P<br>FAM-TCGGCCGAGTTC-MGB                                                                                  | Combined with HSV-1 primers and probes in the line above in single reaction with four primers and two probes.                                                                                                               |
| UL30       | HSV-2 strain 186<br><i>UL30</i> bp 3004-<br>3116; HSV-1 strain<br>17 <i>UL30</i> 2989-<br>3101; ChHV <i>UL30</i> bp<br>3016-3128 | UL30_HSV2_3004_3018 =<br>UL30_HSV1_2989_3013 =<br>UL30_ChHV_3016_3030<br>GAGTGGCTGGCGCGR | UL30_HSV2_3094-3116 =<br>UL30_HSV1_3079_3101=<br>UL30_ChHV_3106_3128<br>GTGAGGACAAAGTCCTGGATGTC | HSV_1_UL30_PB30496<br>FAM-ACTGCAGGC <u>GTT</u> CG-MGB<br><br>HSV_2_ChHV_UL30_PB3049<br>VIC-ACTGC <u>GGG</u> AGTTTGA-MGB | Two virus-common primers combined with two differentially labeled probes in one reaction. The upper probe detects both HSV-1 and majority HSV-2; the lower probe is specific for ChHV and the rare HSV-2 variant (see text) |

<sup>1</sup> *UL39* coordinates from HSV-2 strain 186 (Genbank JN561323.2), or HSV-1 strain 17+ (Genbank JN555585.1). *UL30* coordinates from HSV-2 strain HG52 or chimpanzee alphaherpesvirus (Genbank JQ360576.1).

<sup>2</sup> Name of primer followed by 5' → 3' sequence. Note that underlined S indicates an equimolar mixture of G and C; underlined R is equimolar mix of A and G.

<sup>3</sup> Name of probe followed by 5' → 3' sequence. VIC = proprietary dye, MGB = minor groove binder quencher

dihydrocyclopyrroloindole tripeptide, FAM = 6-carboxyfluorescein. Underlined nucleotides are discriminatory between HSV-1 and HSV-2 or between HSV-1 and ChHV.

<sup>4</sup>There is variation at UL39 nucleotide 2423 (HSV-2 HG52 coordinates) in ***bold italics*** between probe UL39\_S\_MGBP\_1P and probe UL39\_S\_MGBP\_2P. HSV-2 strains 333 and 186, differ at 2423 with 186 having a G nucleotide and 333 having a C nucleotide. HSV-1 strains also have a C at this position. For detection of HSV-2, the presence of the single mismatch at 2423 was tolerated by probe UL39\_S\_MGBP\_2P for identification of ddPCR amplicons from both HSV-2 strains 333 and 186.

Supporting Information Table 5. Primers used for PCR and/or fluorescent dideoxy sequencing.

| primer name                               | sequence 5'→3'         | target sequence and comments                                                                |
|-------------------------------------------|------------------------|---------------------------------------------------------------------------------------------|
| UL39 wholeprimerF_8640-86959 <sup>1</sup> | CCGGTGCGTCCTTTCGGTTCG  | full length <i>UL39</i> PCR and sequencing                                                  |
| UL39 wholeprimerR_90508-90526             | CGGGATCCATGGCGATATG    | full length <i>UL39</i> PCR and sequencing                                                  |
| F-HX1 87022- 87043                        | CACCTTGTTCCAATGGCCA    | primer for full length <i>UL39</i> sequencing                                               |
| F-HX2 87757- 87776                        | ACGTTGTCGTTTCGTCGCAGA  | primer for full length <i>UL39</i> sequencing                                               |
| F-HX3 88435—88454                         | GAAAGGCTTCGCGAACACGA   | primer for full length <i>UL39</i> sequencing                                               |
| F-HX4 89130- 89149                        | TCTGGATGCCGGACCTGTTC   | primer for full length <i>UL39</i> sequencing                                               |
| F-HX5 89816-89835                         | CACTTTAAGCGCAGCATGTA   | primer for full length <i>UL39</i> sequencing                                               |
| R-HX1 90493- 90474                        | GATCGGAGCGCTGTTGCTTA   | primer for full length <i>UL39</i> sequencing                                               |
| UL39VarF                                  | GGGACACCAGCATGTCGCTCG  | PCR and bulk amplicon sequencing for C-terminal region of <i>UL39</i> mixed strain specimen |
| UL39VarR                                  | ACTCCAGATCCAGGCCCATCTT | PCR and bulk amplicon sequencing for C-terminal region of <i>UL39</i> mixed strain specimen |
| M13F-21                                   | TGTAAAACGACGGCCAGT     | sequencing primer for plasmid colonies for TA-cloned C-terminal region of <i>UL39</i>       |

<sup>1</sup>Coordinates are from HSV-2 strain HG52 Genbank JN56323.2

Supporting Information Table 6. HSV-2 sequences deposited in Genbank for this report.

| subject                                                                                                               | strain     | demographics                                | target                        | Genbank  | notes                                                                                                                   | technology     |
|-----------------------------------------------------------------------------------------------------------------------|------------|---------------------------------------------|-------------------------------|----------|-------------------------------------------------------------------------------------------------------------------------|----------------|
| HSV-2 <i>UL39</i> genes with the different genotypes from two swab specimens from the same subject                    |            |                                             |                               |          |                                                                                                                         |                |
| VRC11848                                                                                                              | 2003_16029 | HIV+ male age 46 USA                        | <i>UL39</i> full length       | KT966384 | Same subject as 2007_22031 but different <i>UL39</i> allele. Has long, G19080-like HSV-1 <i>UL39</i> insert             | Manual dideoxy |
| VRC11848                                                                                                              | 2007_22031 | HIV+ male age 49 USA                        | <i>UL39</i> full length       | KT984817 | Same subject as 2003_16029 but different <i>UL39</i> allele Has HSV-2 186-like <i>UL39</i>                              | Manual dideoxy |
| HSV-2 <i>UL39</i> genes with the same genotype from two swab specimens from the same subject                          |            |                                             |                               |          |                                                                                                                         |                |
| VRC6921                                                                                                               | 2006_49895 | HIV- male age 24 USA                        | <i>UL39</i> full length       | KT966386 | Same subject as 2006_49895 and same 186-like <i>UL39</i> allele                                                         | Manual dideoxy |
| VRC6921                                                                                                               | 2006_50074 | HIV- male age 24 USA                        | <i>UL39</i> full length       | KT966387 | Same subject as 2006_50074 and same 186-like <i>UL39</i> allele                                                         | Manual dideoxy |
| HSV-2 <i>UL39</i> gene with long HSV-1 insert representative of the HSV-2 G19080 group recovered from a swab specimen |            |                                             |                               |          |                                                                                                                         |                |
| VRC12162                                                                                                              | 2004_20601 | HIV+ male age 31 USA                        | <i>UL39</i> full length       | KT966385 | Near full length representative of long HSV-1 <i>UL39</i> insert G19080 group                                           | Manual dideoxy |
| HSV-2 <i>UL39</i> gene similar to HSV-2 SD90e and 186 recovered from a swab specimen                                  |            |                                             |                               |          |                                                                                                                         |                |
| VRC6192                                                                                                               | 2010_21    | HIV- female age 71 USA                      | <i>UL39</i> full length       | KT984818 | Strain 186-like <i>UL39</i>                                                                                             | Manual dideoxy |
| HSV-2 <i>UL39</i> gene segments with rare genotypes recovered from swab specimens                                     |            |                                             |                               |          |                                                                                                                         |                |
| VRC6376                                                                                                               | 2008_34536 | HIV- male 39 USA                            | <i>UL39</i> C terminal region | KT966390 | Has rare short right variant HSV-1 insert                                                                               | Manual dideoxy |
| 5060                                                                                                                  | 2010_29299 | HIV- female 28 USA                          | <i>UL39</i> C terminal region | KU053644 | Has rare short right variant HSV-1 insert                                                                               | Manual dideoxy |
| 1216599501201                                                                                                         | 2009_2198  | HIV+ male age 44 Zambia                     | <i>UL39</i> full length       | KU133323 | Has rare short right variant HSV-1 insert. Abstracted from SRP057035 read archive                                       | Illumina       |
| 1684599501201                                                                                                         | 2009_4556  | HIV+ male age 30 Kenya                      | <i>UL39</i> full length       | KU133324 | Has rare short right variant HSV-1 insert. Abstracted from SRP057035 read archive                                       | Illumina       |
| Cloned HSV-2 <i>UL39</i> amplicons from a single swab with heterozygosity at multiple <i>UL39</i> loci                |            |                                             |                               |          |                                                                                                                         |                |
| 332 R-103-1010                                                                                                        | 2004_4373  | HIV+ male age 31 rectal Peru                | <i>UL39</i> C terminal region | KT966388 | commoner variant, G19080-like                                                                                           | Manual dideoxy |
| 332 R-103-1010                                                                                                        | 2004_4373  | HIV+ male age 31 rectal Peru                | <i>UL39</i> C terminal region | KT966389 | rare variant, strain 186-like                                                                                           | Manual dideoxy |
| HSV-2 <i>UL39</i> genes from laboratory strains                                                                       |            |                                             |                               |          |                                                                                                                         |                |
| Not applicable                                                                                                        | HG52       | Not applicable lab strain multiply passaged | <i>UL39</i> full length       | KT984819 | Identical to existing Genbank sequence for HG52, has short HSV-1 <i>UL39</i> insert. Virus in long-term use in our lab. | Manual dideoxy |
| Not applicable                                                                                                        | 333        | Not applicable                              | <i>UL39</i> full              | KT984820 | Identical to existing                                                                                                   | Manual dideoxy |

|                                                                                                                                                             |           |                                             |                         |          |                                                                                                           |                |
|-------------------------------------------------------------------------------------------------------------------------------------------------------------|-----------|---------------------------------------------|-------------------------|----------|-----------------------------------------------------------------------------------------------------------|----------------|
|                                                                                                                                                             |           | lab strain multiply passaged                | length                  |          | Genbank sequence for 333. Virus in long-term use in our lab.                                              |                |
| Not applicable                                                                                                                                              | 186       | Not applicable lab strain multiply passaged | <i>UL39</i> full length | KT984821 | Identical to existing Genbank sequence for 186. Virus in long-term use in our lab.                        | Manual dideoxy |
| Not applicable                                                                                                                                              | G         | Not applicable lab strain passaged once     | <i>UL39</i> full length | KT992822 | Virus obtained from ATCC.                                                                                 | Illumina       |
| HSV-2 <i>UL30</i> genes or segments                                                                                                                         |           |                                             |                         |          |                                                                                                           |                |
| 5073                                                                                                                                                        | 9333      | HIV+ male age 55 Uganda                     | <i>UL30</i> full length | KU258496 | Similar to HSV-2v from Burrel <i>et al.</i> 2015 PMID 26401046. Obtained with target enrichment workflow. | Illumina       |
| 1684599501201                                                                                                                                               | 2009_4556 | HIV+ male age 30 Kenya                      | <i>UL30</i> full length | KU886303 | Similar to majority HSV-2 genotype. Abstracted from SRP057035 read archive                                | Illumina       |
| Not applicable                                                                                                                                              | G         | Not applicable lab strain passaged once     | <i>UL30</i> full length | KU133320 | Virus obtained from ATCC                                                                                  | Illumina       |
| HSV-2 <i>UL29</i> genes or segments                                                                                                                         |           |                                             |                         |          |                                                                                                           |                |
| 1684599501201                                                                                                                                               | 2009-4556 | HIV+ male age 30 Kenya                      | <i>UL29</i> full length | KU133322 | Rare variant. Abstracted from SRP057035 read archive                                                      | Illumina       |
| Not applicable                                                                                                                                              | G         | Not applicable lab strain passaged once     | <i>UL29</i> full length | KU133321 | Virus obtained from ATCC                                                                                  | Illumina       |
| Other sequences relevant to rare HSV-2 strains bearing the HSV-2v <i>UL30</i> sequence as identified by Burrel <i>et al.</i> J. Virology 2015 PMID 27401046 |           |                                             |                         |          |                                                                                                           |                |
| 5073                                                                                                                                                        | 9333      | HIV+ male age 55 Uganda                     | Unique Long (UL) region | KU893109 | Preliminary assembly from target enrichment workflow                                                      | Illumina       |



## Supplemental Information Figure Legends

SI Fig. 1. A: ddPCR genotyping of HSV-2 swab DNA with 5' (top row) and 3' (lower row) *UL39* locus-specific assays. Colored bars schematize the 3' region of *UL39* with HSV-2 strain 186 in red and HSV-1 inserts in blue. Blue and green droplets with HSV-2 strain 186 and HSV-1 genotype PCR products have Y and X axis fluorescence, respectively. For specimen 2010\_29297 from subject 5060, dark black circles contain small numbers of positive droplets. PCR product-negative droplets are black. Cutoffs (purple lines) for positive signals are adjusted for each assay. B-D: Simultaneous infection with HSV-2 strains with different *UL39* genotypes for subject R-103-1010. B: Chromatogram for bulk PCR product is shown below chromatograms for representative cloned HSV-2 186-like and HG52-like variant PCR product. C: ddPCR dotplots for this specimen showing droplets heterozygous at *UL39* loci in upper right quadrants. D: Portion of aligned Illumina NGS for region in B. Vertical arrows connect equivalent genomic positions in sections B and D showing heterozygosity.

SI Fig. 2. Phylogenetic tree of 85 full length HSV-2 *UL39* sequences, HSV-1 strain 17+ *UL39*, and ChHV *UL39*. Selected strains are indicated in larger font.

SI Fig. 3. Recombination analysis of 3' region of the *UL39* gene in HSV-2 strains 2010\_29297 (participant 5060) and 2008\_35742 (participant 6376). Analysis of HSV-2 strain HG52 is shown at bottom for comparison of the location of 5' recombination crossovers. X axis indicates position in the *UL39* ORF in kilobases starting at ATG start. Bootscan and Simplot analyses are depicted for each strain. Clear shifts in bootstrap values supporting different phylogenetic topologies indicate 5' recombination crossovers in all strains (also indicated by dotted lines), but the locations of the crossovers differ between the strains. Each crossover is supported by the Simplot analysis, which demonstrates a shift in similarity with a higher similarity to HSV-1 in the

recombination fragments. To further test and visualize ancestry of the recombination fragments, phylogenetic trees based on the recombination fragment and flanking regions are shown for these strains. The analyzed strains clearly shift from clustering closely to HSV-2 in the trees based on the flanking regions, to clustering closely to HSV-1 in the trees based on the recombination fragments. 3' crossovers are not well seen in these analyses due to lack of sequence distal to the *UL39* stop codon. These results suggest recombination with HSV-2 as major parental, and HSV-1 as minor parental strains.

Koelle *et al.* SI Fig. 1

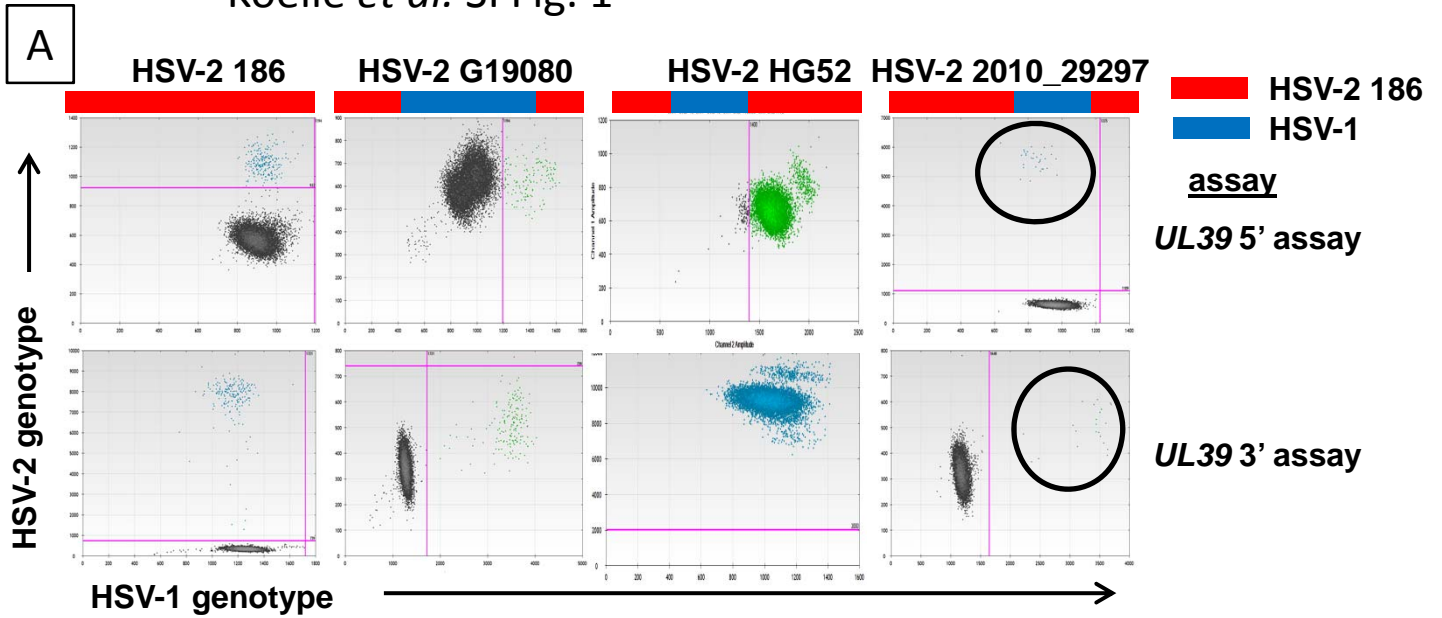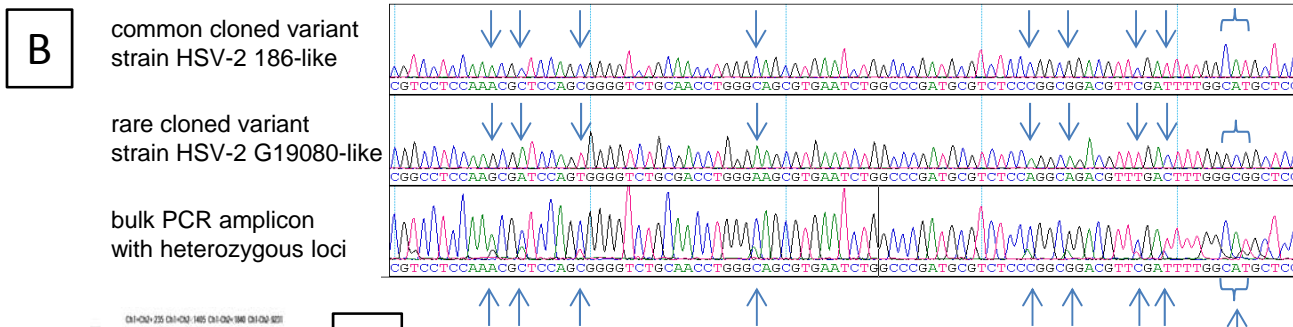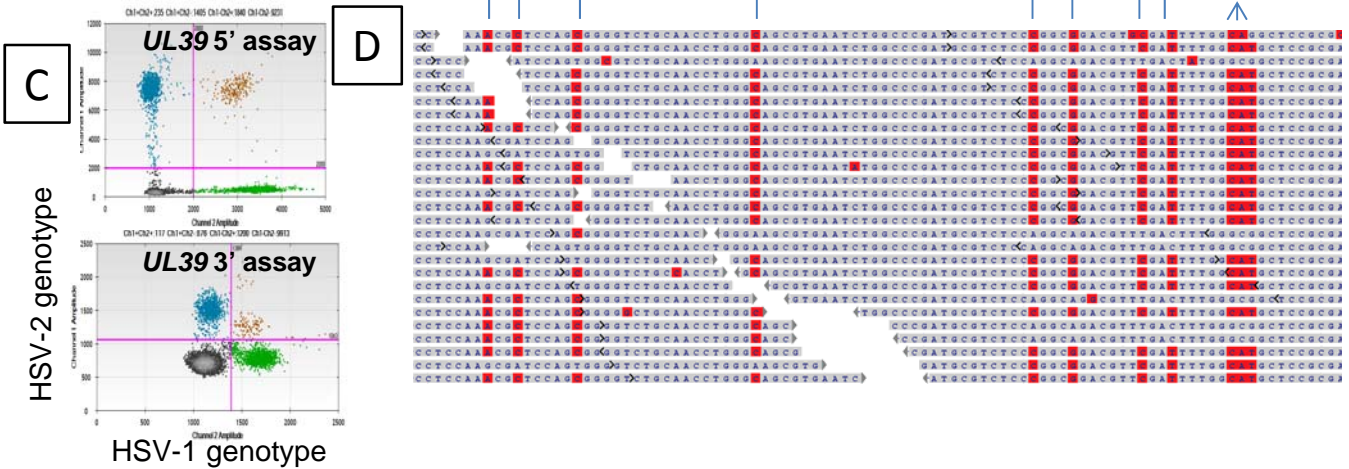

Koelle *et al.* SI Fig. 2

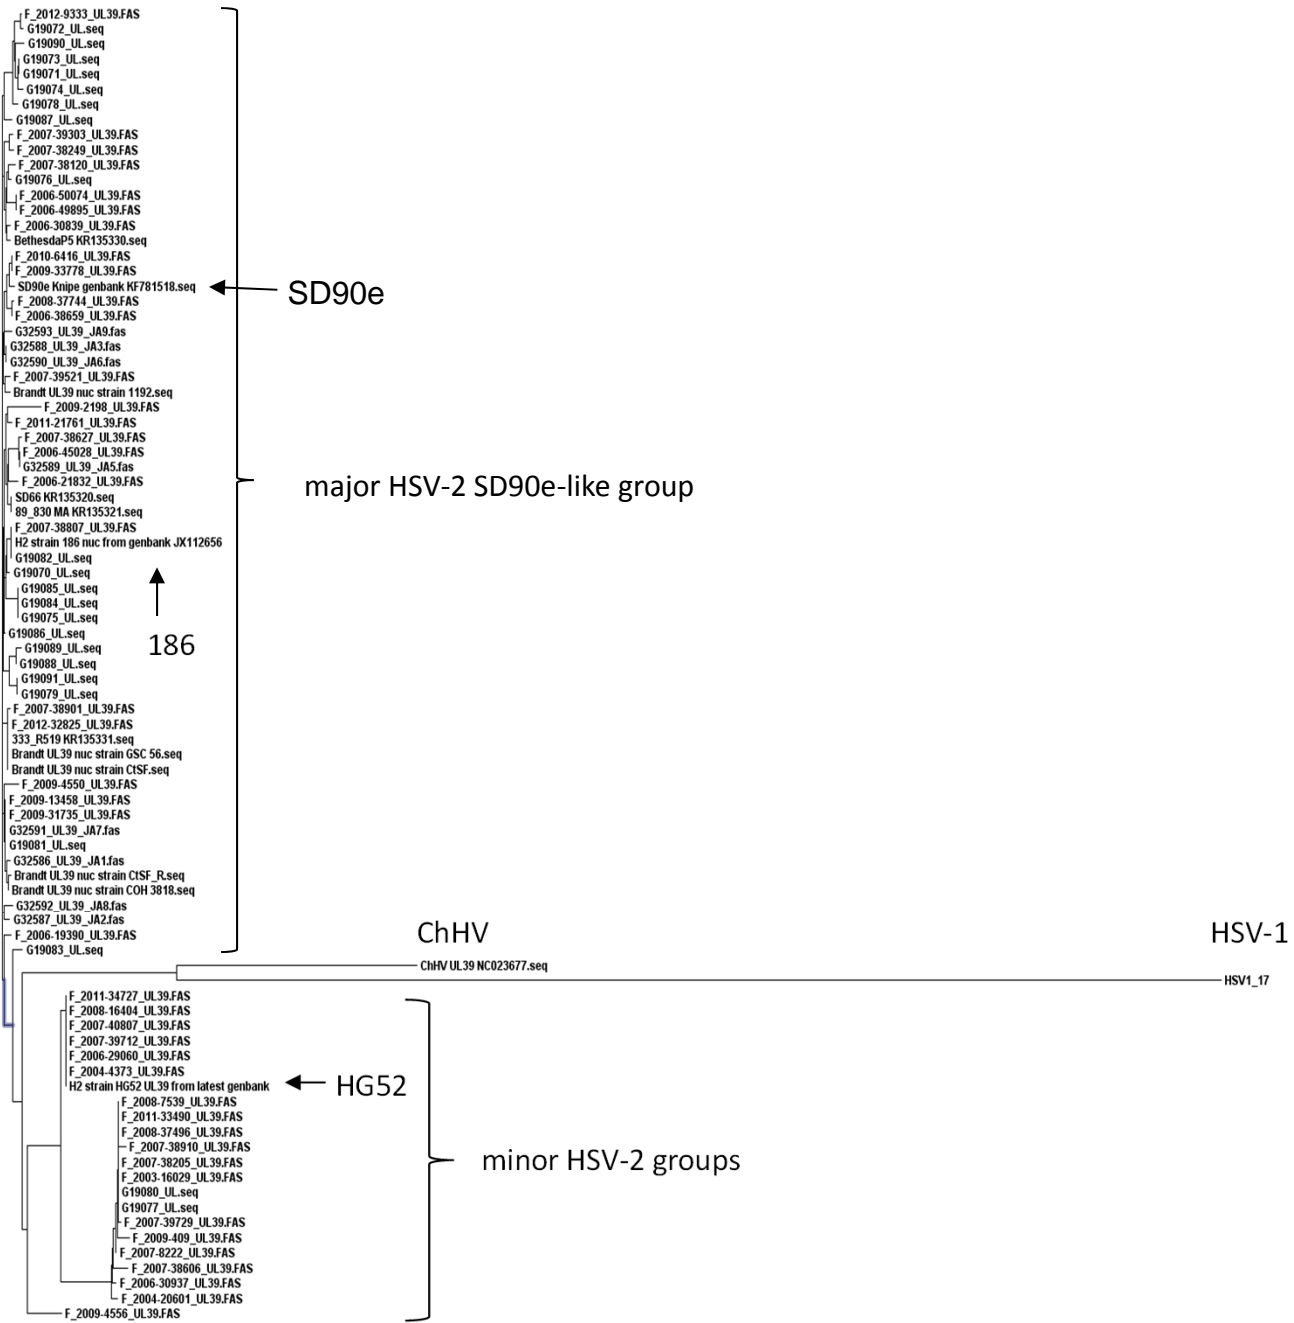

0.02
